# Supplementary material
Source: Springer Nature journal article supplement (https://www.springermedizin.de/resource/supplementary/12958_2010_807_MOESM4_ESM.pdf/9568892)

1

2

A

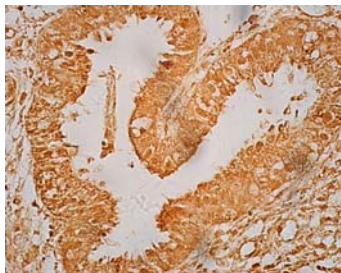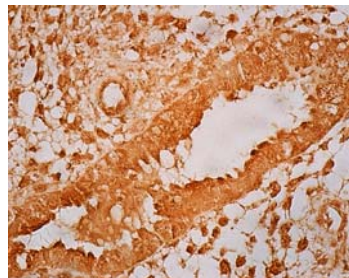

B

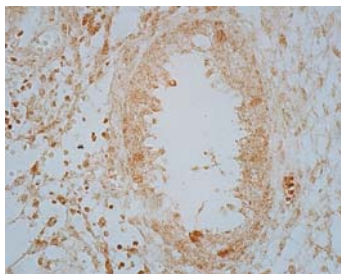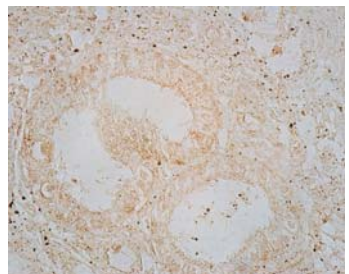

C

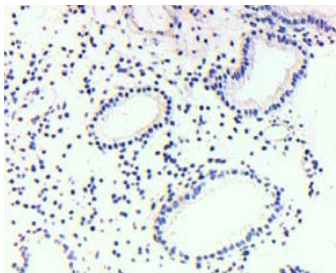

Supplement: MOESM4 [file 9568892]
